# Supplementary material for: Alcohol-Attributable Death and Burden of Illness among Aboriginal and Non-Aboriginal Populations in Remote Australia, 2014–2018
Source: MDPI journal article supplement (doi:10.3390/ijerph20227066), 2023-11-15
Supplement: s1 [file s1]

## Supplementary Tables

**Table S1. Wholly alcohol-related conditions with ICD-10 coding**

| ICD-10 CODE | Wholly alcohol-related conditions                                                       |
|-------------|-----------------------------------------------------------------------------------------|
| E244        | Alcohol-induced pseudo-Cushing's syndrome                                               |
| F10         | Mental & behavioural disorder due to alcohol                                            |
| F100        | Mental & behavioural disorder due to alcohol use ac intoxication                        |
| F101        | Mental & behavioural disorder due to harmful alcohol use                                |
| F102        | Mental & behavioural disorder due to alcohol use dep syndrome                           |
| F103        | Mental & behavioural disorder due to alcohol use withdrawal state                       |
| F104        | Mental & behavioural disorder due to alcohol use withdrawal state with delirium         |
| F105        | Mental & behavioural disorder due to alcohol use psych disorder                         |
| F106        | Mental & behavioural disorder due to alcohol use amnesic syndrome                       |
| F107        | Mental & behavioural disorder due to alcohol Residual and late-onset psychotic disorder |
| F108        | Mental & behavioural disorder due to alcohol other Mental & behavioural disorder        |
| F109        | Mental & behavioural disorder due to alcohol Mental & behavioural disorder NOS          |
| G312        | Degeneration nervous system due to alcohol                                              |
| G621        | Alcoholic polyneuropathy                                                                |
| G721        | Alcoholic myopathy                                                                      |
| I426        | Alcoholic cardiomyopathy                                                                |
| K292        | Alcoholic gastritis                                                                     |
| K70         | Alcoholic liver disease                                                                 |
| K700        | Alcoholic fatty liver                                                                   |
| K701        | Alcoholic hepatitis                                                                     |
| K702        | Alcoholic fibrosis & sclerosis of liver                                                 |
| K703        | Alcoholic cirrhosis of liver                                                            |
| K704        | Alcoholic hepatic failure                                                               |
| K709        | Alcoholic liver disease unspecified                                                     |
| K860        | Alcohol-induced chronic pancreatitis                                                    |
| O354        | Maternal care for (suspected) damage to fetus from alcohol                              |
| P043        | Fetus & newborn affected maternal use alcohol                                           |
| Q860        | Fetal alcohol syndrome (dysmorphic)                                                     |
| R780        | Finding of alcohol in blood                                                             |
| T51         | Toxic effect of alcohol                                                                 |
| T518        | Other alcohols                                                                          |
| T519        | Alcohol unspecified                                                                     |
| X45         | Accidental poisoning by & exposure to alcohol                                           |
| X65         | Intentional self-poisoning alcohol                                                      |
| Y15         | Poisoning alcohol undetermined intent                                                   |
| Y573        | Alcohol deterrents adverse effect Rx use                                                |
| Y90         | Evidence of alcohol involvement determined by blood alcohol level                       |
| Y900        | Blood alcohol level of < 20 mg/100 ml                                                   |
| Y901        | Blood alcohol level of 20-39 mg/100 ml                                                  |
| Y902        | Blood alcohol level of 40-59 mg/100 ml                                                  |
| Y903        | Blood alcohol level of 60-79 mg/100 ml                                                  |
| Y904        | Blood alcohol level of 80-99 mg/100 ml                                                  |
| Y905        | Blood alcohol level of 100-119 mg/100 ml                                                |
| Y906        | Blood alcohol level of 120-199 mg/100 ml                                                |
| Y907        | Blood alcohol level of 200-239 mg/100 ml                                                |
| Y908        | Blood alcohol level 240 mg/100 ml or more                                               |
| Y909        | Presence alcohol in blood level not spec                                                |
| Y91         | Alcohol involvement determined level intoxication                                       |
| Y910        | Mild alcohol intoxication                                                               |
| Y911        | Moderate alcohol intoxication                                                           |
| Y912        | Severe alcohol intoxication                                                             |
| Y913        | Very severe alcohol intoxication                                                        |
| Y919        | Alcohol involvement NOS                                                                 |

**Table S2. Top twenty most frequent alcohol-attributable deaths in males by Aboriginal and non-Aboriginal population, Northern Territory 2014–2018**

| Rank | NT Aboriginal                |        |       | Rank | NT non-Aboriginal            |        |       |
|------|------------------------------|--------|-------|------|------------------------------|--------|-------|
|      | Condition                    | Deaths | %     |      | Condition                    | Deaths | %     |
| 1    | MPC                          | 70.9   | 17.6  | 1    | MPC                          | 51.7   | 16.7  |
| 2    | Suicide and SII              | 53.2   | 13.2  | 2    | Suicide and SII              | 41.8   | 13.5  |
| 3    | Chronic liver disease        | 42.3   | 10.5  | 3    | Chronic liver disease        | 40.3   | 13.0  |
| 4    | RTI motor vehicle occupants  | 27.9   | 6.9   | 4    | RTI motor vehicle occupants  | 20.0   | 6.5   |
| 5    | Coronary heart disease       | 20.9   | 5.2   | 5    | Stroke                       | 11.8   | 3.8   |
| 6    | RTI other                    | 19.1   | 4.8   | 6    | Bowel cancer                 | 11.8   | 3.8   |
| 7    | Homicide and violence        | 17.2   | 4.3   | 7    | Liver cancer                 | 11.3   | 3.6   |
| 8    | Liver cancer                 | 13.2   | 3.3   | 8    | Poisoning                    | 9.2    | 3.0   |
| 9    | Poisoning                    | 12.5   | 3.1   | 9    | RTI motorcyclists            | 8.1    | 2.6   |
| 10   | Falls                        | 10.8   | 2.7   | 10   | Oesophageal cancer           | 7.7    | 2.5   |
| 11   | Cardiomyopathy               | 10.0   | 2.5   | 11   | Falls                        | 7.6    | 2.4   |
| 12   | Oesophageal cancer           | 9.2    | 2.3   | 12   | COPD                         | 7.0    | 2.3   |
| 13   | Stroke                       | 9.0    | 2.2   | 13   | Alcohol use disorders        | 6.0    | 1.9   |
| 14   | Alcohol use disorders        | 8.0    | 2.0   | 14   | Diabetes                     | 5.9    | 1.9   |
| 15   | Drowning                     | 7.7    | 1.9   | 15   | Coronary heart disease       | 5.8    | 1.9   |
| 16   | Diabetes                     | 6.3    | 1.6   | 16   | RTI other                    | 5.2    | 1.7   |
| 17   | Chronic kidney disease       | 6.0    | 1.5   | 17   | Drowning                     | 5.2    | 1.7   |
| 18   | Bowel cancer                 | 5.7    | 1.4   | 18   | Cardiomyopathy               | 5.0    | 1.6   |
| 19   | Other unintentional injuries | 4.7    | 1.2   | 19   | Other unintentional injuries | 4.4    | 1.4   |
| 20   | Epilepsy                     | 4.6    | 1.2   | 20   | Stomach cancer               | 4.0    | 1.3   |
|      | Others                       | 43.1   | 10.7  |      | Others                       | 40.4   | 13.0  |
|      | Total AAD                    | 402.4  | 100.0 |      | Total AAD                    | 310.4  | 100.0 |

Note: AAD – Alcohol-attributable deaths; COPD – Chronic pulmonary obstructive disease; NT – Northern Territory; MPC – Mouth and pharyngeal cancer including nasopharyngeal cancer, lip and oral cavity cancer and other oral cavity and pharynx cancers; RTI – Road traffic injuries; SII – Self-inflicted injuries

**Table S3. Top twenty most frequent alcohol-attributable deaths in females by Aboriginal and non-Aboriginal population, Northern Territory 2014–2018**

| Rank | NT Aboriginal                   |        |       | Rank | NT non-Aboriginal               |        |       |
|------|---------------------------------|--------|-------|------|---------------------------------|--------|-------|
|      | Condition                       | Deaths | %     |      | Condition                       | Deaths | %     |
| 1    | Chronic liver disease           | 43.3   | 16.0  | 1    | Chronic liver disease           | 16.8   | 20.5  |
| 2    | MPC                             | 26.3   | 9.7   | 2    | Suicide and SII                 | 14.8   | 18.1  |
| 3    | Suicide and SII                 | 17.6   | 6.5   | 3    | Breast cancer                   | 6.3    | 7.8   |
| 4    | Stroke                          | 17.0   | 6.3   | 4    | MPC                             | 5.7    | 6.9   |
| 5    | Breast cancer                   | 14.7   | 5.4   | 5    | Stroke                          | 5.2    | 6.4   |
| 6    | Liver cancer                    | 14.6   | 5.4   | 6    | Bowel cancer                    | 4.8    | 5.8   |
| 7    | RTI other                       | 13.3   | 4.9   | 7    | RTI motor vehicle occupants     | 3.8    | 4.6   |
| 8    | RTI motor vehicle occupants     | 13.2   | 4.9   | 8    | Poisoning                       | 2.4    | 2.9   |
| 9    | Diabetes                        | 12.0   | 4.5   | 9    | Liver cancer                    | 2.1    | 2.6   |
| 10   | Homicide and violence           | 11.3   | 4.2   | 10   | Other land transport injuries   | 2.1    | 2.5   |
| 11   | Coronary heart disease          | 8.5    | 3.1   | 11   | Oesophageal cancer              | 1.8    | 2.2   |
| 12   | Lower respiratory infections    | 6.4    | 2.4   | 12   | Hypertensive heart disease      | 1.5    | 1.8   |
| 13   | Poisoning                       | 6.1    | 2.3   | 13   | Falls                           | 1.5    | 1.8   |
| 14   | Atrial fibrillation and flutter | 5.4    | 2.0   | 14   | Other unintentional injuries    | 1.2    | 1.5   |
| 15   | Alcohol use disorders           | 5.0    | 1.9   | 15   | RTI other                       | 1.1    | 1.4   |
| 16   | Other land transport injuries   | 5.0    | 1.9   | 16   | Atrial fibrillation and flutter | 1.0    | 1.2   |
| 17   | Hypertensive heart disease      | 4.8    | 1.8   | 17   | Hepatitis B (acute)             | 1.0    | 1.2   |
| 18   | Bowel cancer                    | 4.3    | 1.6   | 18   | Pneumococcal disease            | 1.0    | 1.2   |
| 19   | Other unintentional injuries    | 4.2    | 1.5   | 19   | Cardiomyopathy                  | 1.0    | 1.2   |
| 20   | Pancreatitis                    | 3.9    | 1.4   | 20   | Other cardiovascular            | 1.0    | 1.2   |
|      | Others                          | 33.3   | 12.3  |      | Others                          | 5.7    | 7.0   |
|      | Total AAD                       | 270.2  | 100.0 |      | Total AAD                       | 81.8   | 100.0 |

Note: AAD – Alcohol-attributable deaths NT – Northern Territory; MPC – Mouth and pharyngeal cancer including nasopharyngeal cancer, lip and oral cavity cancer and other oral cavity and pharynx cancers; RTI – Road traffic injuries; SII – Self-inflicted injuries

**Table S4. Top twenty most frequent alcohol-attributable disability adjusted life years in males by Aboriginal and non-Aboriginal population, Northern Territory 2014–2018**

| NT Aboriginal |                              |          |       | NT non-Aboriginal |                               |          |       |
|---------------|------------------------------|----------|-------|-------------------|-------------------------------|----------|-------|
| Rank          | Condition                    | DALY     | %     | Rank              | Condition                     | DALY     | %     |
| 1             | Homicide and violence        | 4,091.5  | 17.0  | 1                 | Suicide and SII               | 1,864.4  | 15.0  |
| 2             | Suicide and SII              | 3,145.6  | 13.0  | 2                 | RTI motor vehicle occupants   | 1,404.2  | 11.3  |
| 3             | MPC                          | 2,162.1  | 9.0   | 3                 | Homicide and violence         | 1,201.7  | 9.7   |
| 4             | RTI motor vehicle occupants  | 2,125.7  | 8.8   | 4                 | MPC                           | 1,196.2  | 9.6   |
| 5             | Alcohol use disorders        | 1,796.2  | 7.4   | 5                 | Chronic liver disease         | 1,135.2  | 9.2   |
| 6             | Chronic liver disease        | 1,470.4  | 6.1   | 6                 | Alcohol use disorders         | 631.4    | 5.1   |
| 7             | Diabetes                     | 1,119.4  | 4.6   | 7                 | RTI motorcyclists             | 418.6    | 3.4   |
| 8             | RTI other                    | 920.9    | 3.8   | 8                 | Poisoning                     | 354.6    | 2.9   |
| 9             | Falls                        | 911.0    | 3.8   | 9                 | RTI other                     | 325.5    | 2.6   |
| 10            | Coronary heart disease       | 811.4    | 3.4   | 10                | Liver cancer                  | 286.6    | 2.3   |
| 11            | Poisoning                    | 509.5    | 2.1   | 11                | Falls                         | 285.4    | 2.3   |
| 12            | Epilepsy                     | 493.4    | 2.0   | 12                | Drowning                      | 277.9    | 2.2   |
| 13            | Drowning                     | 431.3    | 1.8   | 13                | Diabetes                      | 277.7    | 2.2   |
| 14            | Chronic kidney disease       | 383.8    | 1.6   | 14                | Bowel cancer                  | 250.4    | 2.0   |
| 15            | Cardiomyopathy               | 378.9    | 1.6   | 15                | Other land transport injuries | 237.3    | 1.9   |
| 16            | Stroke                       | 374.0    | 1.6   | 16                | Stroke                        | 237.3    | 1.9   |
| 17            | Liver cancer                 | 365.0    | 1.5   | 17                | COPD                          | 197.5    | 1.6   |
| 18            | Other unintentional injuries | 289.0    | 1.2   | 18                | Other unintentional injuries  | 185.5    | 1.5   |
| 19            | Oesophageal cancer           | 259.9    | 1.1   | 19                | Coronary heart disease        | 184.5    | 1.5   |
| 20            | Bowel cancer                 | 200.2    | 0.8   | 20                | Oesophageal cancer            | 165.9    | 1.3   |
|               | Others                       | 1,877.1  | 7.8   |                   | Others                        | 1,281.5  | 10.3  |
| Total AADALY  |                              | 24,116.4 | 100.0 | Total AADALY      |                               | 12,399.4 | 100.0 |

Note: AADALY – Alcohol-attributable disability adjusted life years; COPD – Chronic pulmonary obstructive disease; NT – Northern Territory; MPC – Mouth and pharyngeal cancer including nasopharyngeal cancer, lip and oral cavity cancer and other oral cavity and pharynx cancers; RTI – Road traffic injuries; SII – Self-inflicted injuries

**Table S5. Top twenty most frequent alcohol-attributable disability adjusted life years in females by Aboriginal and non-Aboriginal population, Northern Territory 2014–2018**

| NT Aboriginal |                                 |          |       | NT non-Aboriginal |                                |         |       |
|---------------|---------------------------------|----------|-------|-------------------|--------------------------------|---------|-------|
| Rank          | Condition                       | DALY     | %     | Rank              | Condition                      | DALY    | %     |
| 1             | Homicide and violence           | 2,800.9  | 19.3  | 1                 | Suicide and SII                | 779.9   | 25.7  |
| 2             | Chronic liver disease           | 1,733.9  | 12.0  | 2                 | Chronic liver disease          | 481.6   | 15.9  |
| 3             | Diabetes                        | 1,165.7  | 8.1   | 3                 | RTI motor vehicle occupants    | 290.7   | 9.6   |
| 4             | Suicide and SII                 | 1,097.0  | 7.6   | 4                 | Breast cancer                  | 199.9   | 6.6   |
| 5             | RTI motor vehicle occupants     | 879.5    | 6.1   | 5                 | MPC                            | 151.9   | 5.0   |
| 6             | MPC                             | 697.3    | 4.8   | 6                 | Homicide and violence          | 147.8   | 4.9   |
| 7             | RTI other                       | 623.0    | 4.3   | 7                 | Bowel cancer                   | 102.4   | 3.4   |
| 8             | Alcohol use disorders           | 555.2    | 3.8   | 8                 | Other land transport injuries  | 95.6    | 3.1   |
| 9             | Stroke                          | 525.0    | 3.6   | 9                 | Poisoning                      | 80.6    | 2.7   |
| 10            | Liver cancer                    | 429.4    | 3.0   | 10                | Stroke                         | 73.2    | 2.4   |
| 11            | Breast cancer                   | 350.7    | 2.4   | 11                | Other unintentional injuries   | 61.1    | 2.0   |
| 12            | Atrial fibrillation and flutter | 342.1    | 2.4   | 12                | RTI other                      | 58.8    | 1.9   |
| 13            | Epilepsy                        | 320.5    | 2.2   | 13                | Epilepsy                       | 55.6    | 1.8   |
| 14            | Coronary heart disease          | 296.1    | 2.0   | 14                | Other blood metabolic disorder | 54.5    | 1.8   |
| 15            | Chronic kidney disease          | 259.6    | 1.8   | 15                | Falls                          | 46.2    | 1.5   |
| 16            | Falls                           | 256.0    | 1.8   | 16                | Liver cancer                   | 40.4    | 1.3   |
| 17            | Poisoning                       | 251.5    | 1.7   | 17                | Fire, burns and scalds         | 39.5    | 1.3   |
| 18            | Other land transport injuries   | 235.9    | 1.6   | 18                | Hepatitis B (acute)            | 39.0    | 1.3   |
| 19            | Other unintentional injuries    | 188.5    | 1.3   | 19                | Pneumococcal disease           | 39.0    | 1.3   |
| 20            | Lower respiratory infections    | 183.5    | 1.3   | 20                | RTI motorcyclists              | 34.5    | 1.1   |
|               | Others                          | 1,288.2  | 8.9   |                   | Others                         | 162.1   | 5.3   |
| Total AADALY  |                                 | 14,479.5 | 100.0 | Total AADALY      |                                | 3,034.0 | 100.0 |

Note: AADALY – Alcohol-attributable disability adjusted life years; COPD – Chronic pulmonary obstructive disease; NT – Northern Territory; MPC – Mouth and pharyngeal cancer including nasopharyngeal cancer, lip and oral cavity cancer and other oral cavity and pharynx cancers; RTI – Road traffic injuries; SII – Self-inflicted injuries
